# Supplementary material
Source: HighWire-hosted journal article supplement (doi:10.1101/rna.079836.123)
Supplement: Supplemental_Material_.pdf [file Supplemental_Material_.pdf]

## Supplemental Files

### **Balanced cell division is secured by two different regulatory sites in OxyS RNA**

Maya Elgrably-Weiss, Fayyaz Hussain, Jens Georg, Bushra Shraiteh, and Shoshy Altuvia

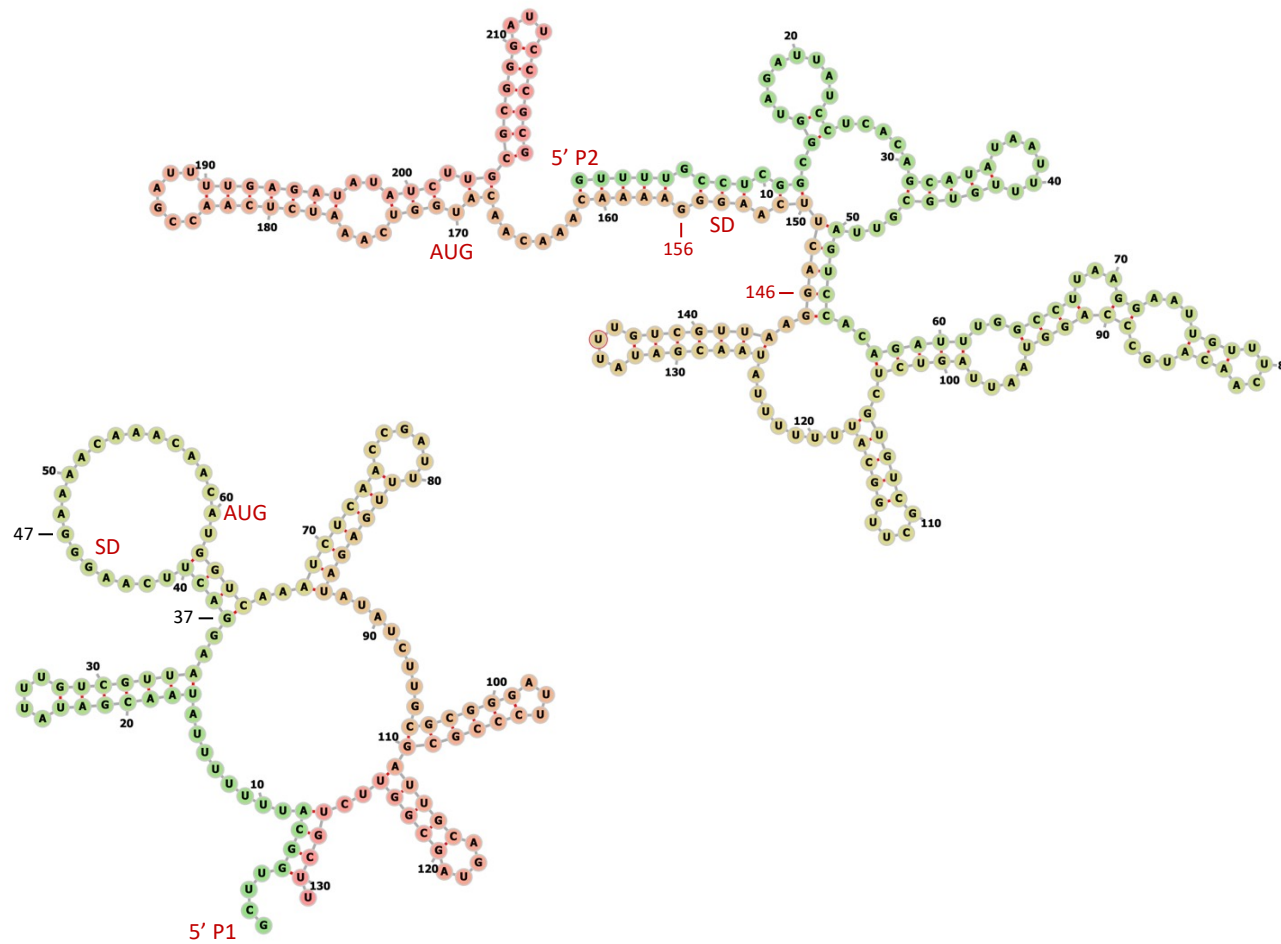

**Supplemental Fig. S1** Predicted secondary structures of short and long *mepS* transcripts using RNA fold program (<http://rna.tbi.univie.ac.at/cgi-bin/RNAWebSuite/RFold.cgi>.) For transcripts details see Figure 2

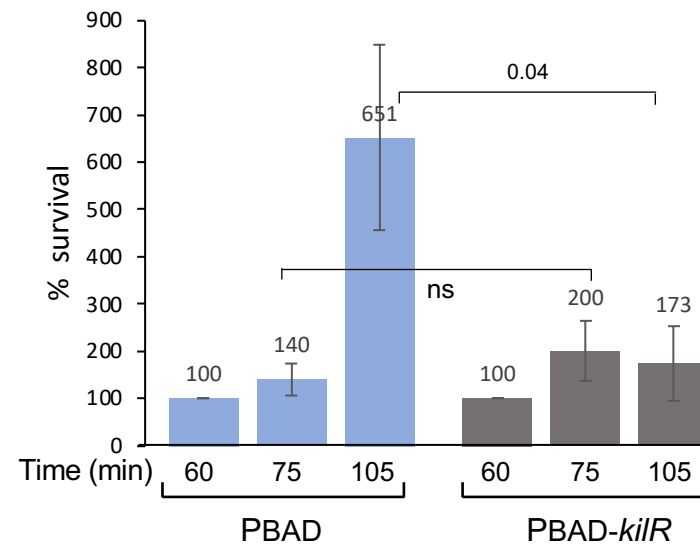

**Supplemental Fig. S2.** Cultures (*MG1655 mal::lacI<sup>q</sup> Δkil::FRT*) carrying *Ptac* as well as PBAD or PBAD-*kilR* were treated with arabinose 0.2% and IPTG (1mM) at dilution, CFU were determined as indicated in the figure. Results are displayed as mean of 3 biological experiments ± standard deviation.

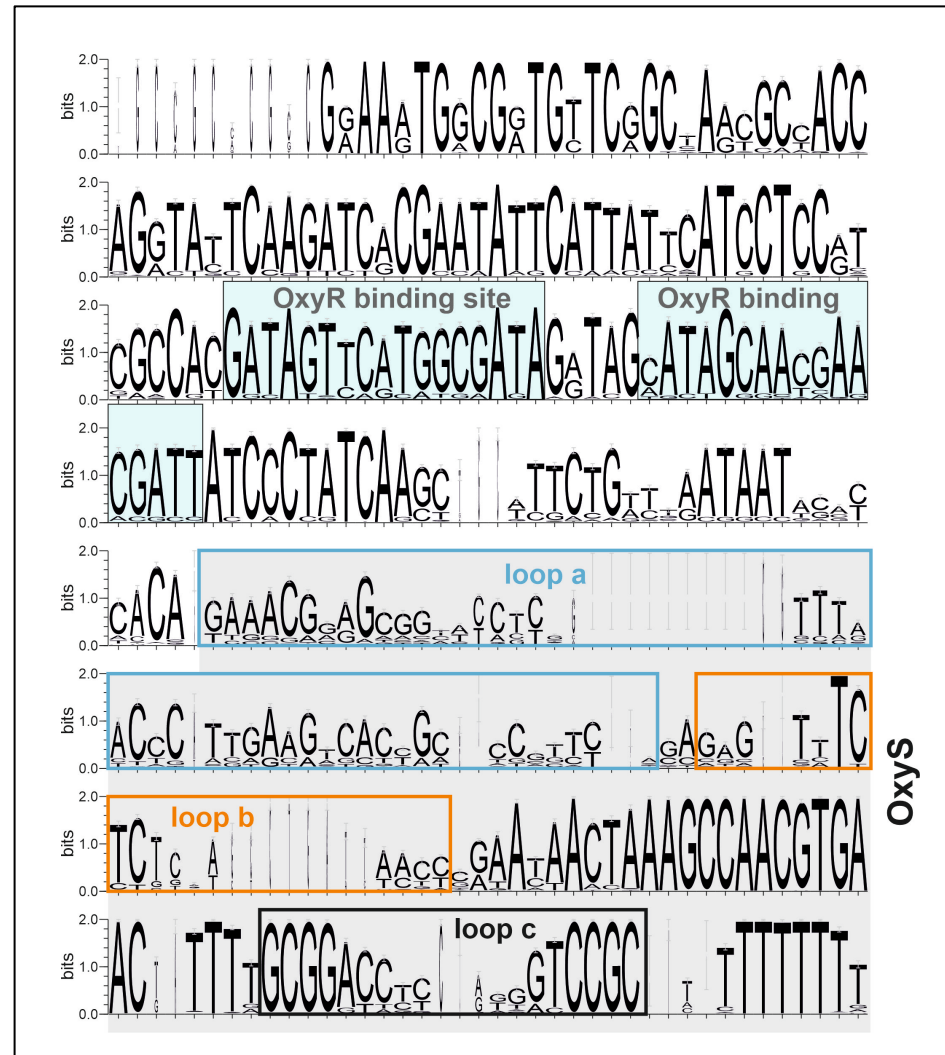

**Supplemental Fig. S3.** OxyS consensus motif based on an alignment of 1340 homologs. The actual sRNA sequence is highlighted in grey. The regions equivalent to loop a, loop b and loop c as defined in *E. coli* OxyS are boxed.

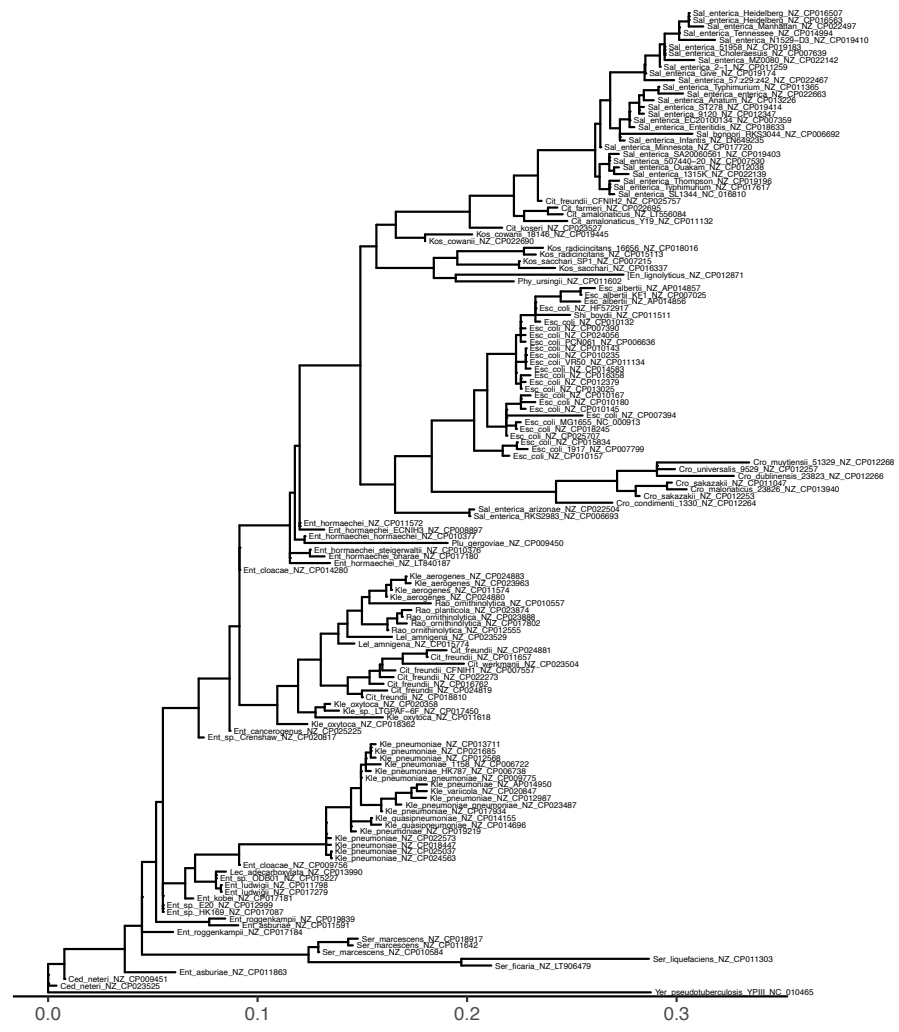

**Supplemental Fig. S4.** Rooted ML-tree based on the 16s rDNA sequences of the 146 investigated organisms. *Y. pseudotuberculosis* YPIII was used as an outgroup.

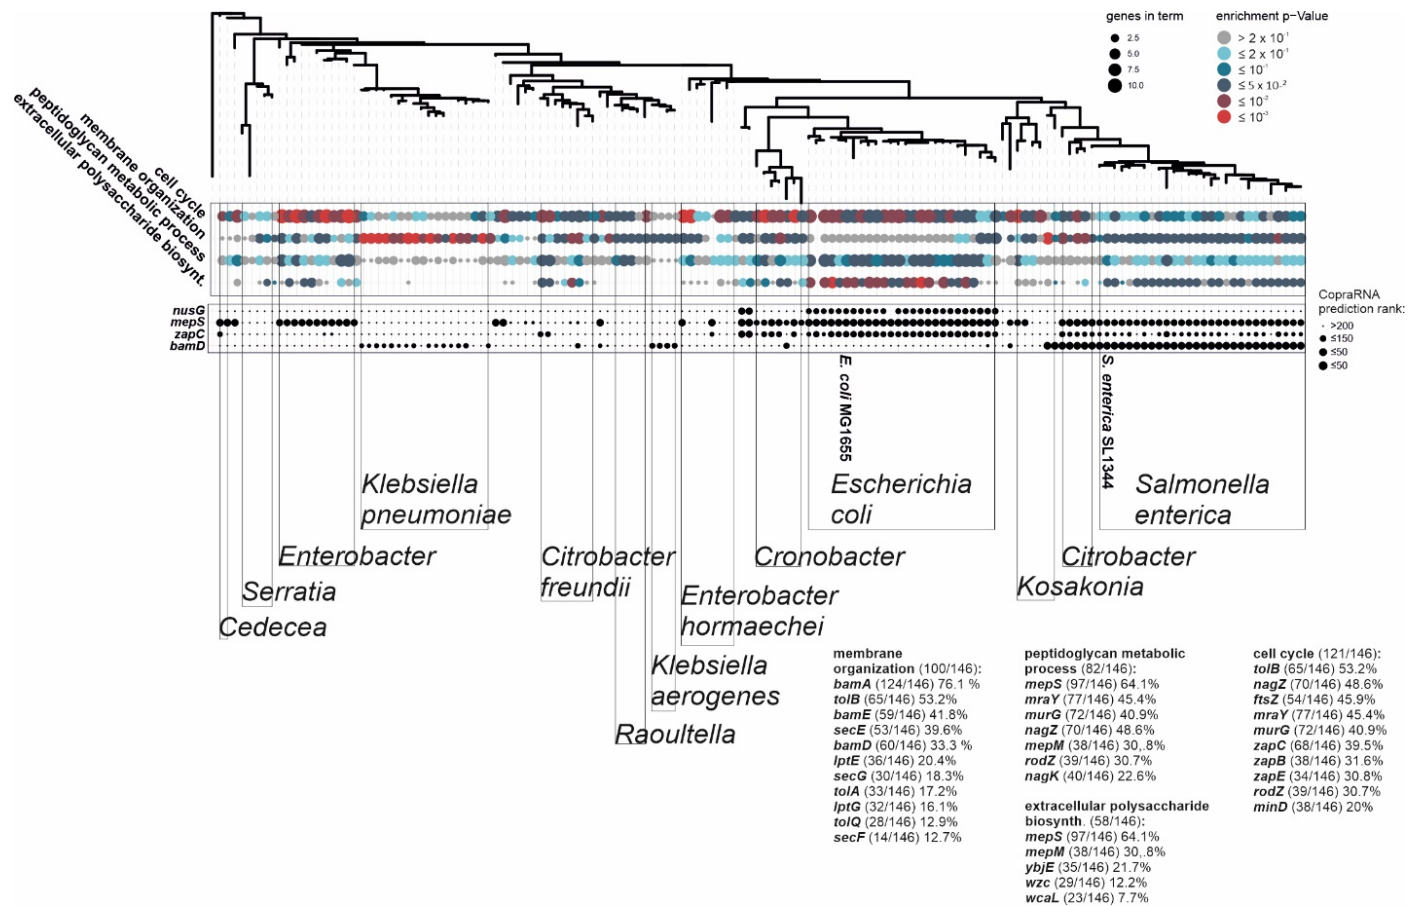

**Supplemental Fig. S5.** Phylogenetic conservation of predicted OxyS functions and targets. Rooted ML-tree based on the 16s rDNA sequences of the 146 investigated organisms. The position of *S. enterica* SL1344, *E. coli* MG1655 and other species groups is indicated at the right side. A reference tree with all species names is given in Supplemental Fig. S4. The middle dot-plot maps the gene set enrichment results for 4 selected terms (cell cycle GO:0007049, membrane organization GO:0061024, peptidoglycan metabolic process GO:0000270, extracellular polysaccharide biosynthetic process GO:0045226) to the tree. The dots are color-coded for the respective enrichment p-Values from red ( $\leq 10^{-3}$ ) to light blue ( $\leq 2 \times 10^{-1}$ ) and grey ( $> 2 \times 10^{-1}$ ). The size of the dots increases with the number of genes belonging to the term in the top 200 target predictions of the respective organism. The right dot-plot shows the predicted conservation of specific targets (*nusG*, *mepS*, *zapC*, *bamD*). The dot size scales with the CopraRNA prediction ranks. The most frequent predicted targets belonging to the 4 displayed GO-terms are shown with the number of organisms where the target was predicted (XX/146) and the phylogenetically weighted abundance in % (See also Table 1 below).

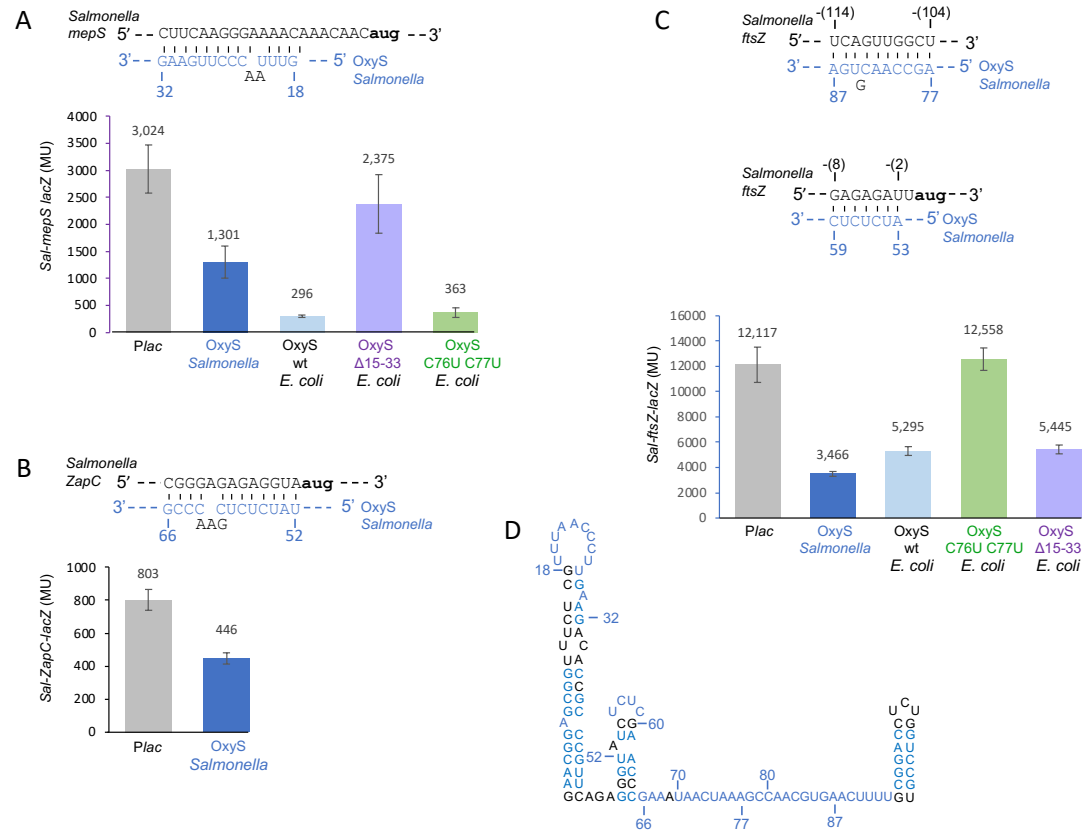

**Supplemental Fig. S6. Salmonella OxyS and cell division and cell elongation targets.** (A,B) The position of the predicted base-pairing between *Salmonella mepS*, *zapC* and OxyS is close to the AUG of the targets (indicated in bold). (C) Two possible interaction sites between *ftsZ* and OxyS are presented, a non-canonical site positioned at 114 to 104 nt upstream of the AUG (top) and a more canonical site located at 8-2 nt upstream of the AUG (bottom). As OxyS C76U C77U is unable to repress *ftsZ-lacZ* indicates that repression is mediated via the top site (D) *Salmonella* OxyS sequence. Nucleotides conserved between *Salmonella* and *E. coli* are in blue. *Salmonella* cultures (SL1344  $\Delta$  *hisG::lacI<sup>q</sup>:cm*) carrying translational fusions of *mepS*, *zapC* and *ftsZ* to *lacZ* (pSC101\*) and Plac-OxyS as indicated were treated with IPTG (1mM) at dilution.  $\beta$ -galactosidase activity was measured 150 min after treatment. Results are displayed as mean of 5 biological experiments  $\pm$  standard deviation).

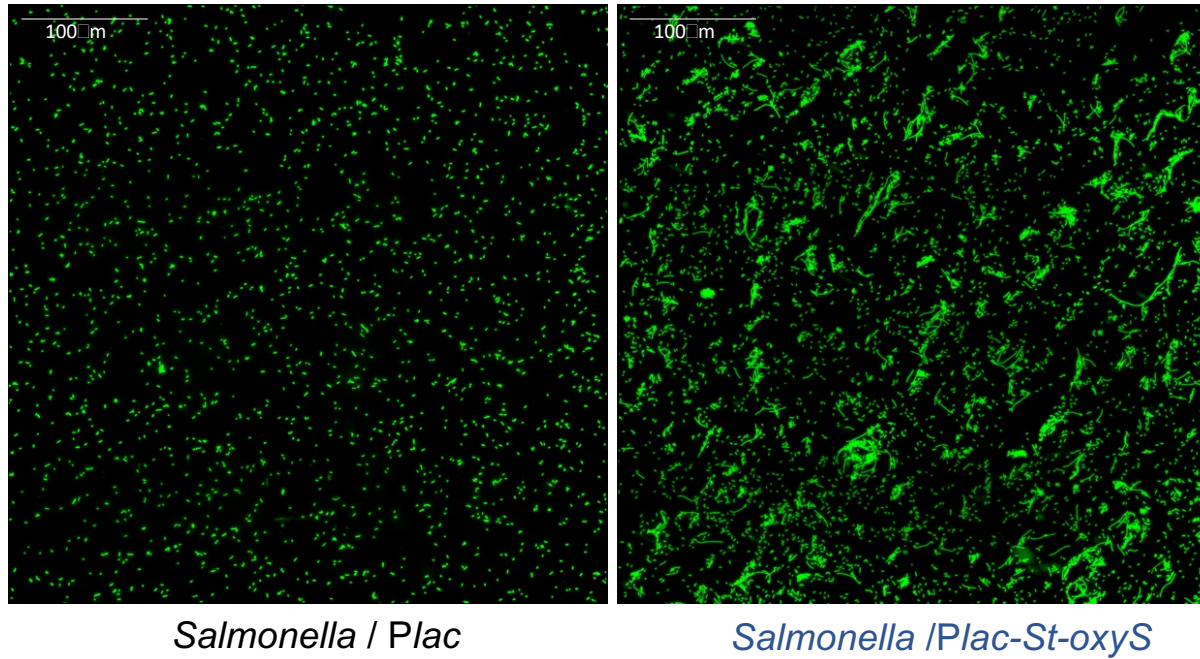

**Supplemental Fig. S7.** Fluorescence microscopy images of *Salmonella* expressing OxyS. Cultures of *Salmonella* (A-834: SL1344  $\Delta hisG::lacI^q$  :cm) carrying control and *Salmonella* OxyS (*Plac-St-oxyS*) expressing plasmid were grown for 20 hours. OxyS was induced by 1 mM of IPTG from dilution. Scale bar 100  $\mu$ m.

**Supplemental Table S1.** Top 10/5 most frequent BP/CC GO-terms in the predictions of the 146 selected organisms after deletion of terms with semantic overlaps.

| GO class             | ID         | term                                          | median pVAL | count | IC       |
|----------------------|------------|-----------------------------------------------|-------------|-------|----------|
| Biological process   | GO:0007049 | cell cycle                                    | 0.02681     | 121   | 4.256431 |
| Biological process   | GO:0000097 | sulfur amino acid biosynthetic process        | 0.047725    | 110   | 5.604985 |
| Biological process   | GO:0061024 | membrane organization                         | 0.0193      | 100   | 5.499624 |
| Biological process   | GO:0051128 | regulation of cellular component organization | 0.07619     | 87    | 4.757687 |
| Biological process   | GO:0010033 | response to organic substance                 | 0.0127      | 83    | 5.029621 |
| Biological process   | GO:0000270 | peptidoglycan metabolic process               | 0.10079     | 82    | 4.389962 |
| Biological process   | GO:0006073 | cellular glucan metabolic process             | 0.11508     | 71    | 5.604985 |
| Biological process   | GO:0010629 | negative regulation of gene expression        | 0.059       | 63    | 3.782828 |
| Biological process   | GO:0045226 | extracellular polysaccharide biosynthesis.    | 0.03595     | 58    | 5.722768 |
| Biological process   | GO:0000003 | reproduction                                  | 0.034425    | 58    | 5.466834 |
| Cellular compartment | GO:0009279 | cell outer membrane                           | 0.0794      | 73    | 3.553163 |
| Cellular compartment | GO:0032153 | cell division site                            | 0.031       | 68    | 4.996616 |
| Cellular compartment | GO:0098796 | membrane protein complex                      | 0.102       | 68    | 3.341193 |
| Cellular compartment | GO:0005667 | transcription regulator complex               | 0.0775      | 28    | 7.136682 |
| Cellular compartment | GO:0032993 | protein-DNA complex                           | 0.0791      | 22    | 4.395842 |

**Supplemental Table S2.** Prediction of interactions between OxyS and possible target genes.  
The numbers (from TSS and on) denote the first and the last nucleotide of the complementary region

| <b>CopraRNA <i>E.coli</i> predicition rank</b> | <b>Gene</b>  | <b>First nt in OxyS</b> | <b>Last nt in OxyS</b> |
|------------------------------------------------|--------------|-------------------------|------------------------|
| 3                                              | b4365 - yjjQ | 14                      | 28                     |
| 5                                              | b2963 - mltC | 12                      | 32                     |
| 8                                              | b2441 - eutB | 12                      | 32                     |
| 12                                             | b2175 - mepS | 25                      | 35                     |
| 15                                             | b4529 - ydbJ | 3                       | 81                     |
| 22                                             | b3721 - bglB | 11                      | 17                     |
| 23                                             | b0784 - moaD | 15                      | 38                     |
| 24                                             | b1460 - ydcC | 15                      | 35                     |
| 29                                             | b4747 - yneP | 16                      | 35                     |
| 41                                             | b0039 - caiA | 15                      | 31                     |
| 42                                             | b1823 - cspC | 3                       | 27                     |
| 54                                             | b1824 - yobF | 15                      | 35                     |
| 55                                             | b3821 - pldA | 12                      | 26                     |
| 59                                             | b0177 - bamA | 23                      | 29                     |
| 65                                             | b0979 - appB | 16                      | 34                     |
| 67                                             | b0946 - zapC | 15                      | 35                     |
| 79                                             | b4595 - yciY | 14                      | 34                     |
| 80                                             | b1093 - fabG | 15                      | 41                     |

**Supplemental Table S3. Strains**

| <b>Lab stock</b> | <b>Relevant genotype</b>                                                          | <b>Source or reference</b>    |
|------------------|-----------------------------------------------------------------------------------|-------------------------------|
| A1063            | XTL634 (W3110 araD<>tetA-sacB-amp)                                                | (Li et al. 2013)              |
| A411             | DY378 (W3110 $\lambda$ cl857 $\Delta$ (cro-bioA))                                 | (Yu et al. 2000)              |
| A708             | MG1655 <i>mal::lacI<sup>q</sup></i>                                               | (Guillier and Gottesman 2006) |
| A817             | (A708) <i>mal::lacI<sup>q</sup> <math>\Delta</math>lacZ::Tn10</i>                 | (Barshishat et al. 2018)      |
| A1086            | (A708) <i>mal::lacI<sup>q</sup> <math>\Delta</math>oxySF::kan</i>                 | This study                    |
| A1120            | (A708) <i>mal::lacI<sup>q</sup> mepS-SPA kan</i>                                  | This study                    |
| A1081            | (A708) <i>mal::lacI<sup>q</sup> oxyS<math>\Delta</math>15-33</i>                  | This study                    |
| A1085            | (A708) <i>mal::lacI<sup>q</sup> oxyS<sub>C76U-C77U</sub></i>                      | This study                    |
| A1104            | (A708) <i>mal::lacI<sup>q</sup> <math>\Delta</math>P2-mepS</i>                    | This study                    |
| A1105            | (A708) <i>mal::lacI<sup>q</sup> <math>\Delta</math>P1-mepS</i>                    | This study                    |
| A834             | SL1344 <i>Salmonella Typhimurium <math>\Delta</math>hisG::lacI<sup>q</sup>:Cm</i> | This study                    |

**Supplemental Table S4. Plasmids**

| Plasmids | Genetic elements                    | Origin  | Marker           | Source or reference           |
|----------|-------------------------------------|---------|------------------|-------------------------------|
| pKD46    |                                     | ColE1   | Amp <sup>r</sup> | (Datsenko and Wanner 2000)    |
| pKD4     |                                     | ColE1   | Kan <sup>r</sup> | (Datsenko and Wanner 2000)    |
| pJL148   |                                     |         | Kan <sup>r</sup> | (Zeghouf et al. 2004)         |
| pEF21    | PBAD                                | p15A    | Cm <sup>r</sup>  | (Guzman et al. 1995)          |
| pBR-Plac | PlacO                               | ColE1   | Amp <sup>r</sup> | (Guillier and Gottesman 2006) |
| pSA84    | MG1655 PlacO-oxys                   | ColE1   | Amp <sup>r</sup> | (Barshishat et al. 2018)      |
| pSA98    | MG1655 PlacO-oxys $\Delta$ 15-33    | ColE1   | Amp <sup>r</sup> | This study                    |
| pSA99    | MG1655 PlacO-oxys C18G, G30C        | ColE1   | Amp <sup>r</sup> | This study                    |
| pSA88    | MG1655 PlacO-oxys C76U-C77U         | ColE1   | Amp <sup>r</sup> | (Barshishat et al. 2018)      |
| pSA100   | SL1344 PlacO-oxys                   | ColE1   | Amp <sup>r</sup> | This study                    |
| pSA97    | MG1655 PlacO-kilR                   | ColE1   | Amp <sup>r</sup> | (Barshishat et al. 2018)      |
| pSA101   | MG1655 PBAD-kilR                    | p15A    | Cm <sup>r</sup>  | This study                    |
| pSA68    | 'lacZ (translation fusion)          | pSC101* | Kan <sup>r</sup> | (Hershko-Shalev et al. 2016)  |
| pSA102   | *MCS 'lacZ (translation fusion)     | pSC101* | Kan <sup>r</sup> | This study                    |
| pSA103   | MG1655 mepS'-'lacZ                  | pSC101* | Kan <sup>r</sup> | This study                    |
| pSA104   | MG1655 ( $\Delta$ P2)P1-mepS'-'lacZ | pSC101* | Kan <sup>r</sup> | This study                    |
| pSA105   | MG1655 P2( $\Delta$ P1)-mepS'-'lacZ | pSC101* | Kan <sup>r</sup> | This study                    |
| pSA106   | MG1655 mepS'C(-18)G-'lacZ           | pSC101* | Kan <sup>r</sup> | This study                    |
| pSA107   | SL1344 mepS'-'lacZ                  | pSC101* | Kan <sup>r</sup> | This study                    |
| pSA108   | SL1344 zapC-'lacZ                   | pSC101* | Kan <sup>r</sup> | This study                    |
| pSA109   | SL1344 Plac-ftsZ-'lacZ              | pSC101* | Kan <sup>r</sup> | This study                    |

\*MCS multiple cloning site carries EcoRI, KpnI, SmaI, BamHI

Supplemental Table S5. Oligonucleotides

Oligonucleotides used for cloning

| Primer | Primer sequence (5'-3') <sup>a</sup>          | Use <sup>b</sup>                  |
|--------|-----------------------------------------------|-----------------------------------|
| 3319   | CC <b>GAATTC</b> ATAAATGTGAGCGGATAACATTG      | <i>PlacO</i> (EcoRI +)            |
| 3320   | CC <b>GGTACC</b> AGTATCTTGTATCCGCTCAC         | <i>PlacO</i> (KpnI -)             |
| 2026   | CCC <b>GACGTC</b> GAAACGGAGCGGCACCTC          | MG1655 <i>oxyS</i> (AatII +)      |
| 2027   | CCC <b>AAGCTT</b> ATCGCCGGCTTTTTATGG          | MG1655 <i>oxyS</i> (HindIII -)    |
| 3419   | TGCCGCTCCGTTTCGACG                            | MG1655 <i>oxyS</i> Δ15-33 (-)     |
| 3420   | TCACTGCCCGTTTCGAGAG                           | MG1655 <i>oxyS</i> Δ15-33 (+)     |
| 3745   | CCCTT <b>CAAGT</b> CACTGCCCGTTTCG             | MG1655 <i>oxyS</i> C18G, G30C (+) |
| 3746   | TTAAAACAGGTGCCGCTCCGTTTC                      | MG1655 <i>oxyS</i> C18G, G30C (-) |
| 3411   | CC <b>GAATTC</b> CGTGCTTTATC TATCGAACGC       | MG1655 <i>mepS</i> (EcoRI +)      |
| 3412   | CC <b>GGATCC</b> CGCAAGATATATCTCAAATCGGTTG    | MG1655 <i>mepS</i> (BamHI -)      |
| 3754   | <b>GAAGGG</b> AAAACAAACAACATGG                | MG1655 <i>mepS</i> C(-18)G (+)    |
| 3755   | AAGTCCTTAACGACAAATATCG                        | MG1655 <i>mepS</i> C(-18)G (-)    |
| 3922   | CC <b>CTGCAGT</b> TGTAAAAATGGAGATAATTATGATTGC | MG1655 <i>kilR</i> (PstI +)       |
| 2701   | CCC <b>AAGCTT</b> TGCAAAGGTGGTAAGCAC          | MG1655 <i>kilR</i> (HindIII -)    |
| 2805   | GGG <b>GACGTC</b> GAAACGGAGCGGTTTCTCGTTAACC   | SL1344 <i>oxyS</i> (AatII +)      |
| 2561   | GGG <b>AAGCTT</b> ACGCCGGTTTTTTTAC            | SL1344 <i>oxyS</i> (HindIII -)    |
| 3940   | AG <b>GAATTC</b> GCAACAATCGGTAA TCTC          | SL1344 <i>mepS</i> (EcoRI+)       |
| 3941   | CG <b>GGATCC</b> AGAACCGCAACTGCAATC           | SL1344 <i>mepS</i> (BamHI -)      |
| 3942   | AG <b>GAATTC</b> GCGAGGAGCTACGCTGG            | SL1344 <i>zapC</i> (EcoRI +)      |
| 3943   | CC <b>GGATCC</b> GCGAGATCGAGCATCATACG         | SL1344 <i>zapC</i> (BamHI -)      |
| 3952   | GTC <b>GGTACC</b> GGGATTGCTTCACTACGGG         | SL1344 <i>ftsZ</i> (KpnI +)       |
| 3953   | TCT <b>GGATCCC</b> ACCGACGCCGATGAC            | SL1344 <i>ftsZ</i> (BamHI -)      |

<sup>a</sup>Nucleotides in bold indicate restriction sites mutations or cloning sequences. <sup>b</sup>Plus (+) and minus (-) strands are indicated.

Oligonucleotides used for construction of *E. coli* strains

| Primer | Primer sequence (5'-3') <sup>a</sup>                                                  | Use <sup>b</sup>                            |
|--------|---------------------------------------------------------------------------------------|---------------------------------------------|
| 3651   | ATTATCCCTATCAAGCATTCTGACTGATAATTGCTCACAT <b>TGTAGGCTGGAGCTGCTT C</b>                  | <i>ΔoxySF</i> ( <i>kan</i> +)               |
| 3652   | TGTATAAATTTGAGCCTGCT TATCGCCGGGCTTTTTTATGGCAAAAAAAAA <b>ATGGGAATTAGCCATGGTCC</b>      | <i>ΔoxySF</i> ( <i>kan</i> -)               |
| 2156   | <b>CAGGCCGTTTAAGCGATGATTCACGAAAT TGCTGGCCCG</b> GATGTCAATCTCTATCACTG                  | <i>hisG::lacI<sup>q</sup>:Cm</i> (+)        |
| 2157   | <b>TCGGCAGTACCAGAATCGAGCTGGCGCCAAGCGCTTTCAG</b> CAAGCGAGCTCGATATC                     | <i>hisG::lacI<sup>q</sup>:Cm</i> (-)        |
| 3425   | ATCCCTATCAAGCATTCTGACTGATAATTGCTCACAGAAACGGAGCGGCAT <b>CCTAATTTTTGTTGACTCTATC</b>     | <i>oxyS::tet-sacB Δ15-33</i> (+)            |
| 3426   | CAGTTGGCTTTAGTTATTCGAGTTGAGAACTCTCGAAACGGGCAGTGAAT <b>CAAAGGGAAA</b> ACTGTCCATA       | <i>oxyS::tet-sacB Δ15-33</i> (-)            |
| 3427   | CGCTGTCCAGTT GCGCCAG                                                                  | Scarless <i>oxyS Δ15-33</i> , C76U-C77U (+) |
| 3428   | TGCCGCTCCGTTTCTGTGAG                                                                  | Scarless <i>oxyS Δ15-33</i> (+)             |
| 3429   | CTCACAGAAACGGAGCGCA TCCTG CCCGTTTCGAGAGTTTC                                           | Scarless <i>oxyS Δ15-33</i> (-)             |
| 3430   | TCGACGCGCTCGATACCTGG                                                                  | Scarless <i>oxyS Δ15-33</i> , C76U-C77U (-) |
| 3640   | CCTTGAAGTCACTGCCGTTTCGAGAGTTTCTCAACTCGAATAACTAAAG <b>TCCTAATTTTTGTTGACTCTATC</b>      | <i>oxyS::tet-sacB</i> C76U-C77U (+)         |
| 3641   | GCTTTTTTATGGCAAAAAAAAAAGCGATCCTGGAGATCCGCAAAAGTTCACGTTAT <b>CAAAGGGAAA</b> ACTGTCCATA | <i>oxyS::tet-sacB</i> C76U-C77U (-)         |
| 3642   | CTTTAGTTATTCGAGTTGAGAACTCTCG                                                          | Scarless <i>oxyS</i> C76U-C77U (+)          |
| 3643   | CCGTTTCGAGAGTTTCTCAACTCGAATAACTAAAG <b>TTAACGTGA</b> ACTTTT                           | Scarless <i>oxyS</i> C76U-C77U (-)          |
| 3722   | TTGACCAACCCCGCTTATTAACTTTCTGTATCACTTTTTCTTATAAAAAAT <b>CCTAATTTTTGTTGACTCTATC</b>     | <i>mepS::tet-sacB ΔP2</i> (+)               |
| 3723   | TAACGCACAAAATTATATGCTGTGAGGATAATCTACCGCCGAGGCCAAAAC <b>ATCAAAGGGAAA</b> ACTGTCCATA    | <i>mepS::tet-sacB ΔP2</i> (-)               |
| 3726   | ACGAGATAGCTTTCCCGG                                                                    | Scarless <i>oxyS ΔP2</i> , ΔP1 (+)          |
| 3724   | TTTTTATAAGAAAAGTGATACAGAAAGTTAATAAGC                                                  | Scarless <i>oxyS ΔP2</i> (+)                |
| 3725   | GCTTATTAACTTTCTGTATCACTTTTTCTTATAAAAAAGTTTTGCCTCGGCGGTAG                              | Scarless <i>oxyS ΔP2</i> (-)                |
| 3727   | GCTGGTGAAGCATGGAC                                                                     | Scarless <i>oxyS ΔP2</i> , ΔP1 (-)          |
| 3728   | GTGCGTTAGTCCACAGTTTGGCCTTAAGGAAC <b>CGTTTCAACATGCCAGGTCCTAATTTTTGTTGACTCTATC</b>      | <i>mepS::tet-sacB ΔP1</i> (+)               |
| 3729   | TTCCCTTGAAGTCTTAACGACAAATATCGTTATAAAAAATGCCAAGCGACACGAT <b>CAAAGGGAAA</b> ACTGTCCATA  | <i>mepS::tet-sacB ΔP1</i> (-)               |
| 3730   | CCTGGGCATGTTGAAAC <b>GGTT C</b>                                                       | Scarless <i>oxyS ΔP1</i> (-)                |
| 3731   | GAACCGTTTCAACATGCCAGG <b>CGCGG CGCCGCGTGTGCTTGGC</b> ATTTTTTATAACG                    | Scarless <i>oxyS ΔP1</i> (+)                |
| 3751   | GAAGCG TTACAACGAAGCACGCCGGG TTCTAGCCG CAGCT <b>CCATGGAAAAGAGAAG</b>                   | <i>mepS</i> -SPA (+)                        |
| 3752   | CGTCAGGATAGCCAAGGGATTGCATCCAACGGTTTAtt <b>AGTTCCTATTCCGAAGTTC</b>                     | <i>mepS</i> -SPA (-)                        |
| 3753   | CAGCAGAA TGAACCGTACTGG                                                                | <i>mepS</i> -SPA insertion (+)              |

|      |                                      |                                |
|------|--------------------------------------|--------------------------------|
| 3691 | <b>CGCCTAGG</b> ATAGCCTGGATCAAGACGCG | <i>mepS</i> -SPA insertion (-) |
| 2227 | GGATGAGATTTTCTTAAAGCGG               | SPA sequence                   |

<sup>a</sup>Nucleotides in bold indicate restriction sites, mutations or cloning sequences. <sup>b</sup>Plus (+) and minus (-) strands are indicated.

#### Oligonucleotides used for *in vitro* RNA synthesis

| Primer | Primer sequence (5'-3') <sup>a</sup>                                   | fragment <sup>b</sup>                 |
|--------|------------------------------------------------------------------------|---------------------------------------|
| 3719   | <b>CGAAATTAATACGACTCACTATAGGGACAGG</b> GTTTTGCCTCGGCGGTAG              | <b>PT7</b> - <i>mepS</i> P2 long (+)  |
| 3720   | <b>CGAAATTAATACGACTCACTATAGGGACAGG</b> GCTTGGCATTMTTTTATAACGATATTTGTCG | <b>PT7</b> - <i>mepS</i> P1 short (+) |
| 3721   | CATGCAGAAAGCAGAACCGC                                                   | <i>mepS</i> (-)                       |
| 2238   | <b>CGAAATTAATACGACTCACTATAGGGACAGG</b> GAAACGGAGCGGCACC                | <b>PT7</b> - <i>OxyS</i> (+)          |
| 2027   | <b>CCCAAGCTT</b> ATCGCCGGCTT TTTATGG                                   | <i>oxyS</i> (-)                       |

<sup>a</sup>Nucleotides in bold indicate restriction sites, mutations or cloning sequences. <sup>b</sup>Plus (+) and minus (-) strands are indicated.

#### Oligonucleotides used for RNA detection

| Primer | Primer sequence (5'-3') <sup>a</sup>      | Use                    |
|--------|-------------------------------------------|------------------------|
| 3708   | GGATCCTGGAGATCCGCAAAAGTTCACG              | <i>oxyS</i>            |
| 3740   | CCTTGAGCTTCGGTATTC                        | <i>mepS</i> (in vivo)  |
| 3412   | <b>CCGGATCC</b> CGCAAGATATATCTCAAATCGGTTG | <i>mepS</i> (in vitro) |
| 1912   | CCGCGTCCGAAATTCCTA                        | tm RNA                 |

<sup>a</sup>Nucleotides in bold indicate restriction sites, mutations or cloning sequences.

## Supplemental references

- Barshishat S, Elgrably-Weiss M, Edelstein J, Georg J, Govindarajan S, Haviv M, Wright PR, Hess WR, Altuvia S. 2018. OxyS small RNA induces cell cycle arrest to allow DNA damage repair. *EMBO J* **37**: 413-426.
- Datsenko KA, Wanner BL. 2000. One-step inactivation of chromosomal genes in Escherichia coli K-12 using PCR products. *Proc Natl Acad Sci U S A* **97**: 6640-6645.
- Guillier M, Gottesman S. 2006. Remodelling of the Escherichia coli outer membrane by two small regulatory RNAs. *Mol Microbiol* **59**: 231-247.
- Guzman LM, Belin D, Carson MJ, Beckwith J. 1995. Tight regulation, modulation, and high-level expression by vectors containing the arabinose PBAD promoter. *J Bacteriol* **177**: 4121-4130.
- Hershko-Shalev T, Odenheimer-Bergman A, Elgrably-Weiss M, Ben-Zvi T, Govindarajan S, Seri H, Papenfort K, Vogel J, Altuvia S. 2016. Gifsy-1 Prophage IsrK with Dual Function as Small and Messenger RNA Modulates Vital Bacterial Machineries. *PLoS Genet* **12**: e1005975.
- Li XT, Thomason LC, Sawitzke JA, Costantino N, Court DL. 2013. Bacterial DNA polymerases participate in oligonucleotide recombination. *Mol Microbiol* **88**: 906-920.
- Thomason MK, Bischler T, Eisenbart SK, Förstner KU, Zhang A, Herbig A, Nieselt K, Sharma CM, Storz G. 2015. Global transcriptional start site mapping using differential RNA sequencing reveals novel antisense RNAs in Escherichia coli. *J Bacteriol* **197**: 18-28.
- Yu D, Ellis HM, Lee EC, Jenkins NA, Copeland NG, Court DL. 2000. An efficient recombination system for chromosome engineering in Escherichia coli. *Proc Natl Acad Sci U S A* **97**: 5978-5983.
- Zeghouf M, Li J, Butland G, Borkowska A, Canadien V, Richards D, Beattie B, Emili A, Greenblatt JF. 2004. Sequential Peptide Affinity (SPA) system for the identification of mammalian and bacterial protein complexes. *J Proteome Res* **3**: 463-468.
